# Supplementary material for: A novel long-alkyl-chained acylhydrazone-based supramolecular polymer gel for the ultrasensitive detection and separation of multianalytes
Source: Royal Society of Chemistry journal article supplement (doi:10.1039/c9sm00624a), 2019-01-01
Supplement: c9sm00624a1.pdf [file c9sm00624a1.pdf]

*Supporting Information*

**A Novel Long-alkyl Chains Acylhydrazone-based Supramolecular  
Polymer Material for Ultrasensitive Detection and Separation of  
Multianalytes**

Zhi-Yuan Yin, Jing Han Hu\*, Qing-Qing Fu, Kai Gui and Ying Yao

College of Chemical and Biological Engineering, Lanzhou Jiaotong University, Lanzhou,  
gansu, 730070, P. R. China

# Table of contents

## Materials and methods

### Experimental Section

**Scheme 1** The synthesis of G.

**Fig. S1**  $^1\text{H}$  NMR spectra of G.

**Fig. S2**  $^{13}\text{C}$  NMR spectra of G.

**Fig. S3** HRMS spectra of G.

**Table S1.** Gelation properties of gelator G.

**Fig. S4** Fluorescence spectra of OGV (1.0%, in DMSO) in the presence of various anions ( $\text{Ca}^{2+}$ ,  $\text{Mg}^{2+}$ ,  $\text{Pb}^{2+}$ ,  $\text{Ni}^{2+}$ ,  $\text{Co}^{2+}$ ,  $\text{Hg}^{2+}$ ,  $\text{Zn}^{2+}$ ,  $\text{Cd}^{2+}$ ,  $\text{Ag}^+$ ,  $\text{Cr}^{3+}$ ,  $\text{Cu}^{2+}$ ,  $\text{Al}^{3+}$ ,  $\text{Fe}^{3+}$ ,  $\text{Ba}^{2+}$ ,  $\text{La}^{3+}$ ,  $\text{Eu}^{3+}$  and  $\text{Tb}^{3+}$ , respectively, using their 0.1 mol  $\text{L}^{-1}$  sodium or potassium salts water solution as the sources) at room temperature ( $\lambda_{\text{ex}}=310$  nm).

**Table S2.** Calculation the detection line of HgG, FeG, HgG +  $\text{CN}^-$  and FeG +  $\text{H}_2\text{PO}_4^-$ .

**Fig. S5** Fluorescent titrations spectra of HgG and FeG and linear fitting of titration curves of HgG and FeG.

**Table S2** Calculation the detection line of HgG, FeG, HgG +  $\text{CN}^-$  and FeG +  $\text{H}_2\text{PO}_4^-$ .

**Fig. S6** Fluorescent titrations spectra of (a) HgG and (c) FeG and linear fitting of titration curves for (b) HgG and (d) FeG.

**Fig. S7** Fluorescence spectra of HgG (1.0%, in DMSO) in the presence of various anions ( $\text{F}^-$ ,  $\text{Cl}^-$ ,  $\text{Br}^-$ ,  $\text{I}^-$ ,  $\text{AcO}^-$ ,  $\text{H}_2\text{PO}_4^-$ ,  $\text{HSO}_4^-$ ,  $\text{N}_3^-$ ,  $\text{SCN}^-$ ,  $\text{S}_2^-$ ,  $\text{ClO}_4^-$ , and  $\text{CN}^-$ ), respectively, using their 0.1 mol  $\text{L}^{-1}$  sodium or potassium salts water solution as the sources) at room temperature ( $\lambda_{\text{ex}}=310$  nm).

**Fig. S8** Fluorescence spectra of FeG (1.0%, in DMSO) in the presence of various anions ( $\text{F}^-$ ,  $\text{Cl}^-$ ,  $\text{Br}^-$ ,  $\text{I}^-$ ,  $\text{AcO}^-$ ,  $\text{H}_2\text{PO}_4^-$ ,  $\text{HSO}_4^-$ ,  $\text{N}_3^-$ ,  $\text{SCN}^-$ ,  $\text{S}_2^-$ ,  $\text{ClO}_4^-$ , and  $\text{CN}^-$ ), respectively, using their 0.1 mol  $\text{L}^{-1}$  sodium or potassium salts water solution as the sources, at room temperature ( $\lambda_{\text{ex}}=310$  nm).

**Fig. S9** The linear fitting of titration curves for (a) HgG+ $\text{CN}^-$  and (b) FeG+ $\text{H}_2\text{PO}_4^-$ .

**Fig. S10** FT-IR spectra of (a) powder G and xerogel of organogel OGV (b) xerogel of OGV, HgG and HgG treated with  $\text{CN}^-$ , (c) xerogel of OGV, FeG and FeG treated with  $\text{H}_2\text{PO}_4^-$ .

**Fig. S11** Powder XRD pattern of (a) organogel OGV and metallogel (HgG and FeG), (b) organogel OGV, HgG and HgG treated with  $\text{CN}^-$ , (c) organogel OGV, FeG and FeG treated with  $\text{H}_2\text{PO}_4^-$ .

**Fig. S12** SEM image of (a) HgG xerogel; (b) FeG xerogel ; (c) HgG xerogel treated with  $\text{CN}^-$ ; (d) FeG xerogel treated with  $\text{H}_2\text{PO}_4^-$ .

## Materials and physical methods

All reagents and starting materials were obtained from commercial suppliers and used as received unless otherwise noted. All anions were used as sodium or potassium salts while all cations were used as the perchlorate salts, which were purchased from Alfa Aesar and used as received. Fresh double distilled water was used throughout the experiment. Nuclear magnetic resonance (NMR) spectra were recorded on Varian Mercury 400 and Varian Inova 600 instruments. Mass spectra were recorded on a Bruker Esquire 6000 MS instrument. The X-ray Diffraction analysis (XRD) was performed in a transmission mode with a Rigaku RINT2000 diffractometer equipped with graphite monochromated CuK $\alpha$  radiation ( $\lambda=1.54073$  Å). The morphologies and Sizes of the xerogels were characterized using field emission scanning electron microscopy (FE-SEM, JSM-6701F) at an accelerating voltage of 8kV. The infrared spectra were performed on a Digilab FTS-3000 Fourier transform-infrared spectrophotometer. Melting points were measured on an X-4 digital melting-point apparatus (uncorrected). Fluorescence spectra were recorded on a Shimadzu RF-5301PC spectrofluorophotometer.

## Experimental Section

As shown in **Scheme 1**, the compound 3, 4, 5-tris (hexadecyloxy) benzohydrazide was synthesized according to the literature-reported methods.<sup>21</sup> The G was synthesized as follow: vanilline (1mmol), 3,4,5-tris(hexadecyloxy)-benzohydrazide (1 m mol) and acetic acid (0.1 m L, as a catalyst) were added to ethanol (20 m L). Then the reaction mixture was stirred at 80°C for 24 h, after the solvent was removed, the precipitated G was yielded and recrystallized with CHCl<sub>3</sub>–CH<sub>2</sub>CH<sub>3</sub>OH to get the pour solid G. (Yield: 80%). m.p.126-128°C. <sup>1</sup>H NMR (500 MHz, CDCl<sub>3</sub>)  $\delta$  9.12, 8.18, 7.53, 7.26, 7.01, 6.92, 5.91, 4.01, 3.96, 1.80, 1.58, 1.46, 1.26, 0.88. (**Fig S1**). <sup>13</sup>C NMR (126 MHz, CDCl<sub>3</sub>)  $\delta$  185.03, 153.25, 148.36, 147.14, 141.56, 130.89, 126.14, 114.03, 107.69, 105.90, 76.77, 73.57, 69.39, 56.21, 31.94, 30.93, 29.74, 29.38, 26.12, 22.70, 14.12. (**Fig S2**). ESI-MS m/z: calcd for C<sub>16</sub>H<sub>110</sub>N<sub>2</sub>O<sub>6</sub> [G+ H]<sup>+</sup>: 991.84; found: 991.84(**Fig S3**).

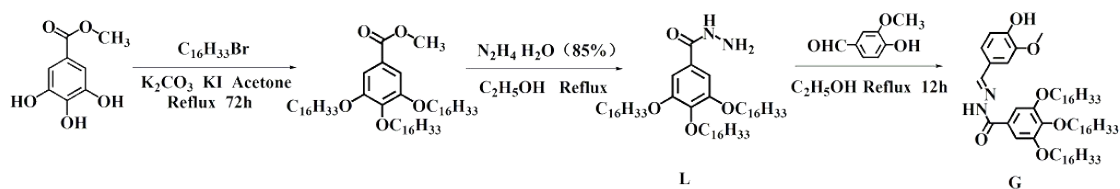

**Scheme 1** The synthesis of G.

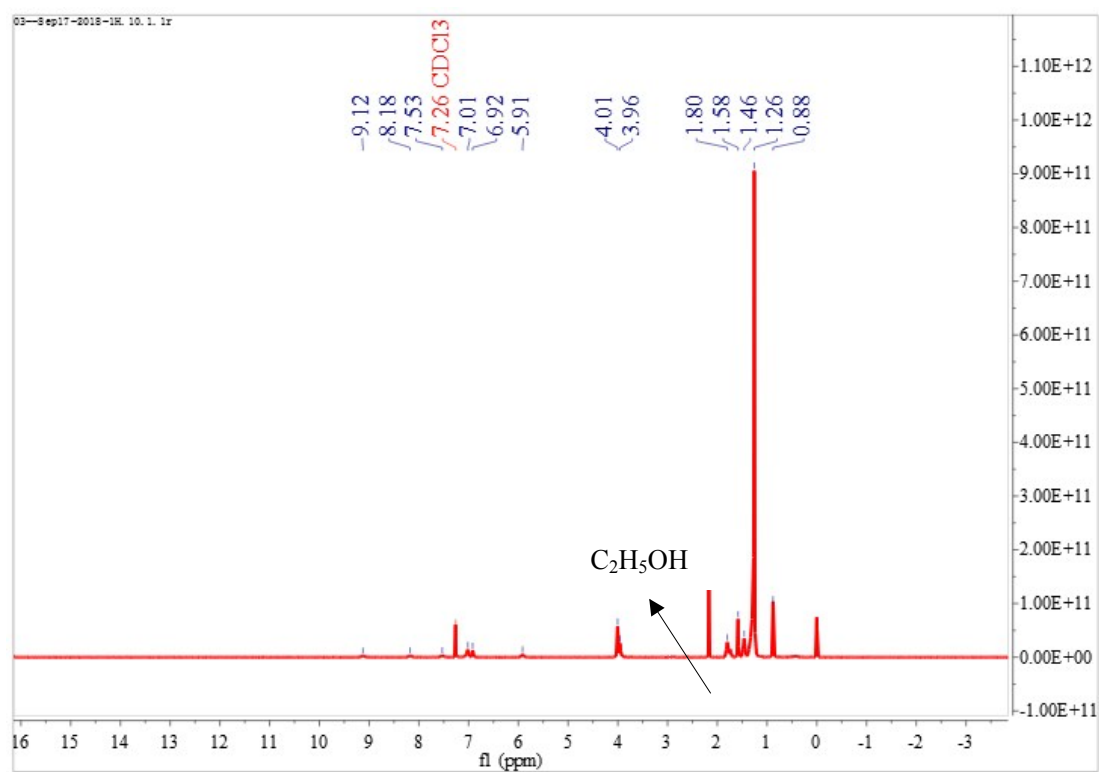

Fig. S1 <sup>1</sup>H NMR spectra of G.

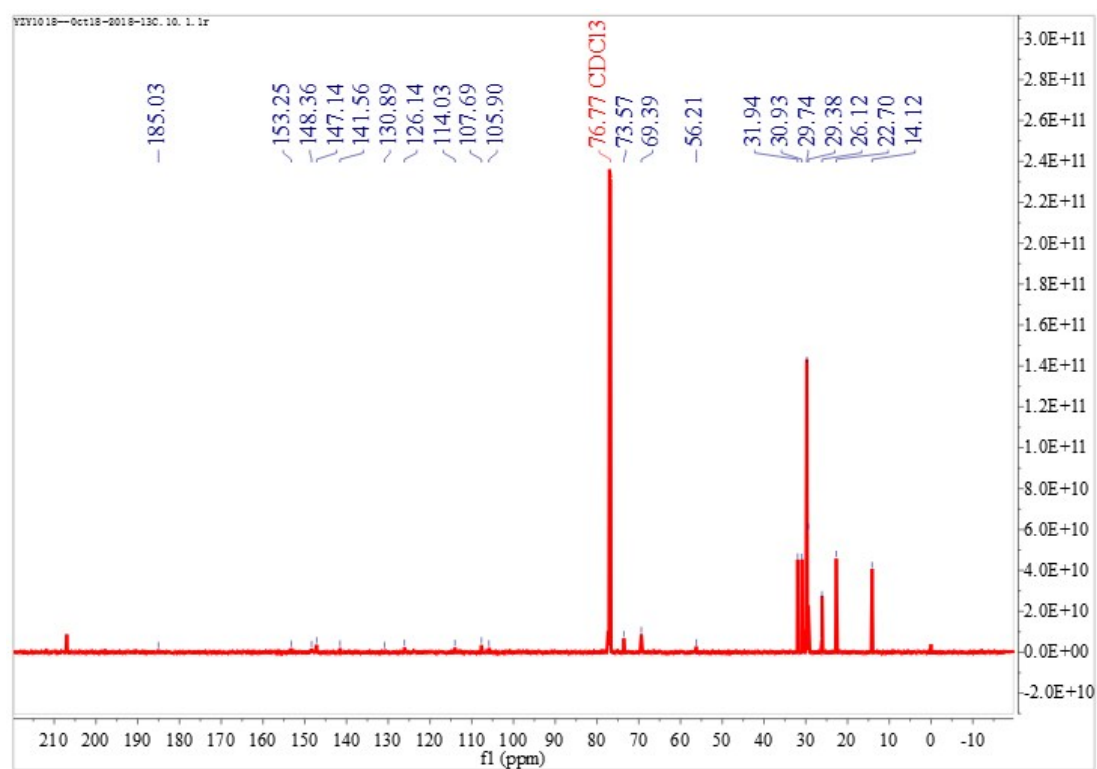

Fig. S2 <sup>13</sup>C NMR spectra of G.

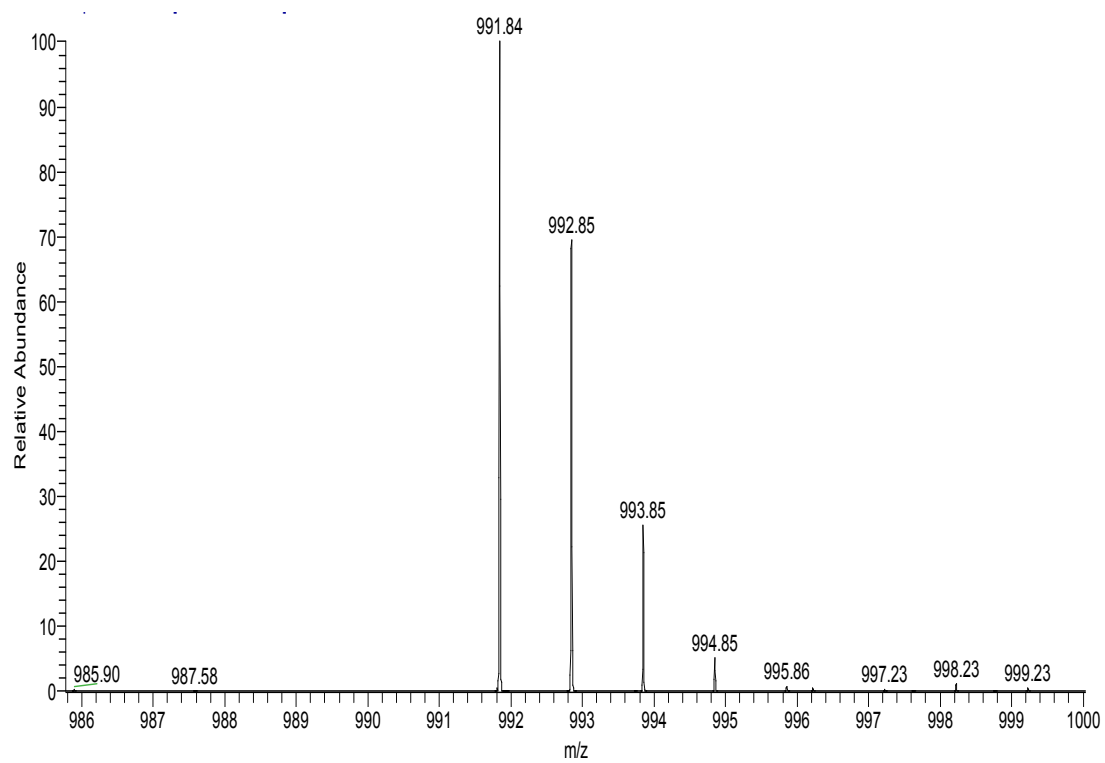

**Fig. S3** MAS spectra of G.

| Solvent               | Gelation Behavior <sup>a</sup> | Gelating time | MGC <sup>b</sup> | MGT <sup>c</sup> |
|-----------------------|--------------------------------|---------------|------------------|------------------|
| MeOH                  | G                              | 3min          | 1                | 49               |
| MeOH-H <sub>2</sub> O | SP                             | —             | —                | —                |
| EtOH                  | SP                             | —             | —                | —                |
| EtOH-H <sub>2</sub> O | SP                             | —             | —                | —                |
| i-PrOH                | SP                             | —             | —                | —                |
| n-BuOH                | SP                             | —             | —                | —                |
| Acetone               | SP                             | —             | —                | —                |
| Acetonitrile          | SP                             | —             | —                | —                |
| <b>DMSO</b>           | <b>G</b>                       | <b>1min</b>   | <b>1</b>         | <b>53</b>        |
| DMSO-H <sub>2</sub> O | SP                             | —             | —                | —                |
| DMF                   | SP                             | —             | —                | —                |
| DMF-H <sub>2</sub> O  | SP                             | —             | —                | —                |
| THF                   | S                              | —             | —                | —                |
| Toluene               | S                              | —             | —                | —                |
| Chloroform            | S                              | —             | —                | —                |
| Methylene chloride    | S                              | —             | —                | —                |
| Carbon tetrachloride  | S                              | —             | —                | —                |

<sup>a</sup>G, gel; S, solution; SP, solution precipitate.

<sup>b</sup>MGC is the minimum gelator concentration (w/v%, 10 mg mL<sup>-1</sup> = 1%).

<sup>c</sup>MGT is the gelation temperature (°C) at the minimum gelator concentration

**Table S1.** Gelation properties of gelator G.

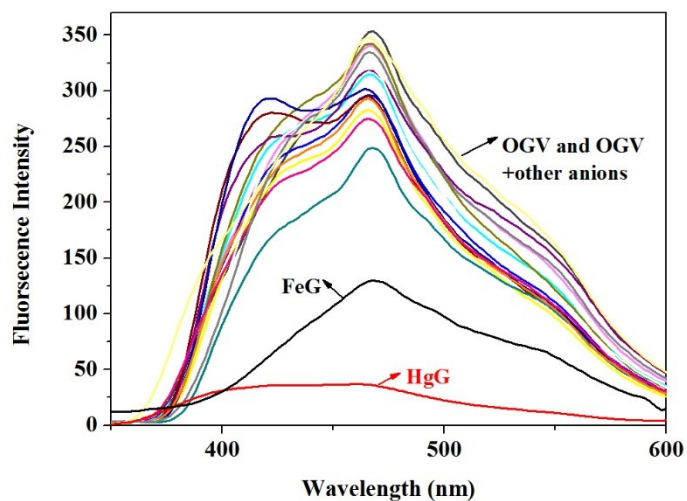

**Fig. S4** Fluorescence spectra of OGV (1.0%, in DMSO) in the presence of various anions ( $\text{Ca}^{2+}$ ,  $\text{Mg}^{2+}$ ,  $\text{Pb}^{2+}$ ,  $\text{Ni}^{2+}$ ,  $\text{Co}^{2+}$ ,  $\text{Hg}^{2+}$ ,  $\text{Zn}^{2+}$ ,  $\text{Cd}^{2+}$ ,  $\text{Ag}^{+}$ ,  $\text{Cr}^{3+}$ ,  $\text{Cu}^{2+}$ ,  $\text{Al}^{3+}$ ,  $\text{Fe}^{3+}$ ,  $\text{Ba}^{2+}$ ,  $\text{La}^{3+}$ ,  $\text{Eu}^{3+}$  and  $\text{Tb}^{3+}$ , respectively, using their  $0.1 \text{ mol L}^{-1}$  sodium or potassium salts water solution as the sources) at room temperature ( $\lambda_{\text{ex}} = 310 \text{ nm}$ ).

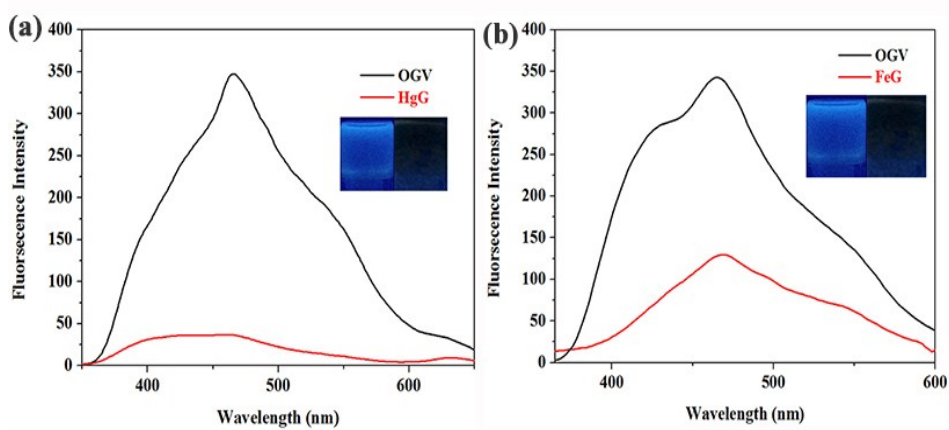

**Fig. S5** Fluorescence spectra of OGV (1.0%, in DMSO) and OGV in the presence of  $\text{Hg}^{2+}$  and  $\text{Fe}^{3+}$  at room temperature ( $\lambda_{\text{ex}} = 310 \text{ nm}$ ).

|                                  | $\delta$ | A          | S                         | LOD                   |
|----------------------------------|----------|------------|---------------------------|-----------------------|
| HgG                              | 1.49     | -1417.2939 | -1383.84236 $\times 10^6$ | 3.15 $\times 10^{-9}$ |
| FeG                              |          | -525.3651  | -613.16189 $\times 10^6$  | 2.83 $\times 10^{-9}$ |
| HgG + $\text{CN}^-$              |          | 400.4766   | 480.88306 $\times 10^6$   | 3.72 $\times 10^{-9}$ |
| Fe G + $\text{H}_2\text{PO}_4^-$ |          | 633.611    | 633.01123 $\times 10^6$   | 2.35 $\times 10^{-9}$ |

Calculation formula of LOD

Linear Equation:  $y = Ax + B$

$$\text{LOD} = K \times \frac{\delta}{S} (K = 3)$$

$$\delta = \sqrt{\frac{\sum (F_i - F_0)^2}{N-1}} (N = 20)$$

$$S = A \times 10^6$$

**State**,  $F_i$ : the fluorescence intensity of OGV at  $\lambda_{\text{ex}} = 310$  nm;  $F_0$ : the average of 20 times fluorescence intensity of OGV at  $\lambda_{\text{ex}} = 310$  nm; **A**: slope of linear fitting of fluorescence titration;

**B**: intercept of linear fitting of fluorescence titration.

**Table S2** Calculation the detection line of HgG, FeG, HgG +  $\text{CN}^-$  and FeG +  $\text{H}_2\text{PO}_4^-$ .

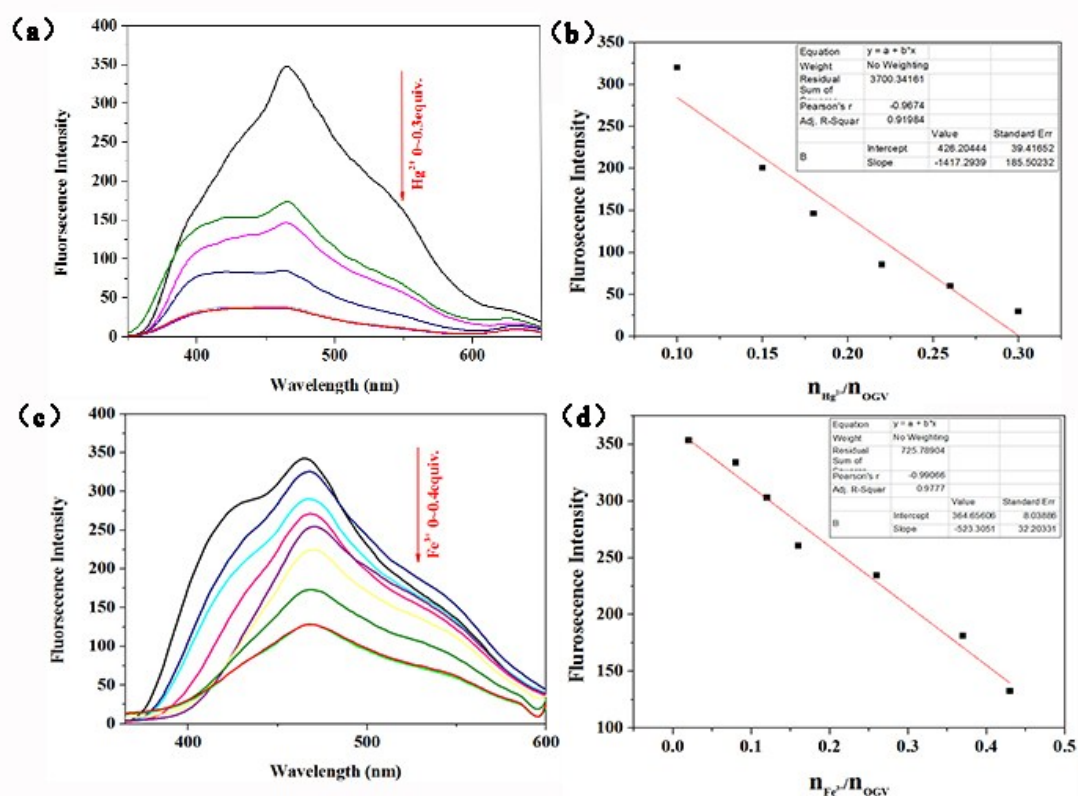

**Fig. S6** Fluorescent titration spectra of (a) HgG and (c) FeG and linear fitting of titration curves for (b) HgG and (d) FeG.

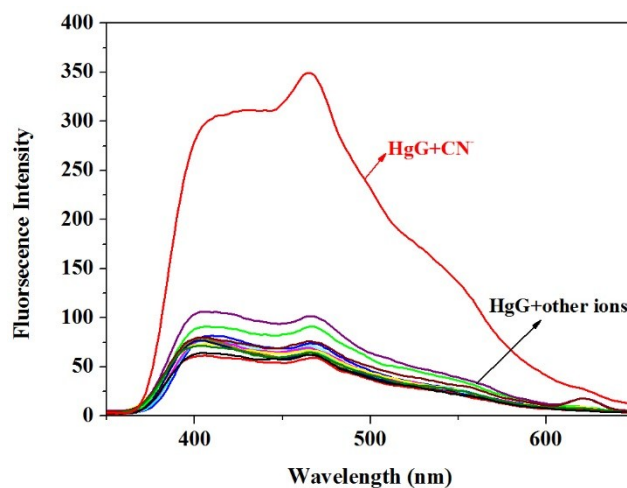

**Fig. S7** Fluorescence spectra of HgG (1.0%, in DMSO) in the presence of various anions ( $\text{F}^-$ ,



$\text{Cl}^-$ ,  $\text{Br}^-$ ,  $\text{I}^-$ ,  $\text{AcO}^-$ ,  $\text{H}_2\text{PO}_4^-$ ,  $\text{HSO}_4^-$ ,  $\text{N}_3^-$ ,  $\text{SCN}^-$ ,  $\text{S}_2^-$ ,  $\text{ClO}_4^-$ , and  $\text{CN}^-$ ), respectively, using their  $0.1 \text{ mol L}^{-1}$  sodium or potassium salts water solution as the sources) at room temperature ( $\lambda_{\text{ex}}=310 \text{ nm}$ ).

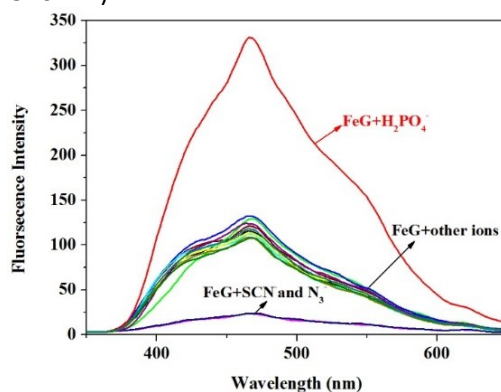

**Fig. S8** Fluorescence spectra of FeG (1.0%, in DMSO) in the presence of various anions ( $\text{F}^-$ ,  $\text{Cl}^-$ ,  $\text{Br}^-$ ,  $\text{I}^-$ ,  $\text{AcO}^-$ ,  $\text{H}_2\text{PO}_4^-$ ,  $\text{HSO}_4^-$ ,  $\text{N}_3^-$ ,  $\text{SCN}^-$ ,  $\text{S}_2^-$ ,  $\text{ClO}_4^-$ , and  $\text{CN}^-$ ), respectively, using their  $0.1 \text{ mol L}^{-1}$  sodium or potassium salts.

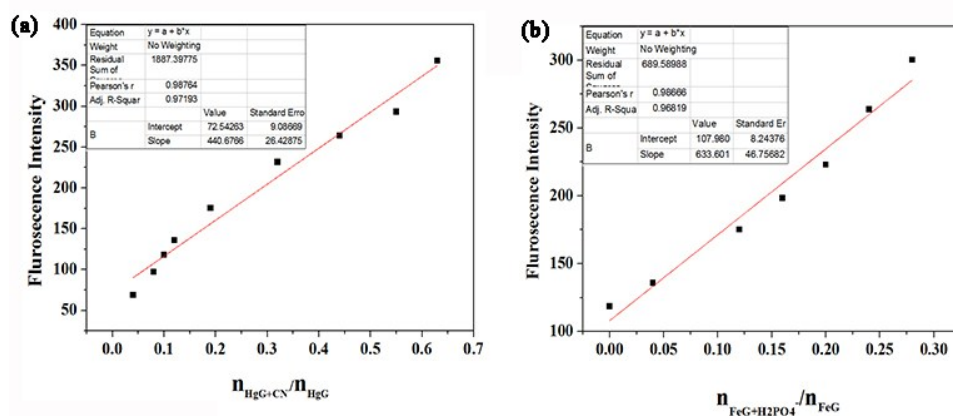

**Fig. S9** The linear fitting of titration curves for (a)  $\text{HgG}+\text{CN}^-$  and (b)  $\text{FeG}+\text{H}_2\text{PO}_4^-$ .

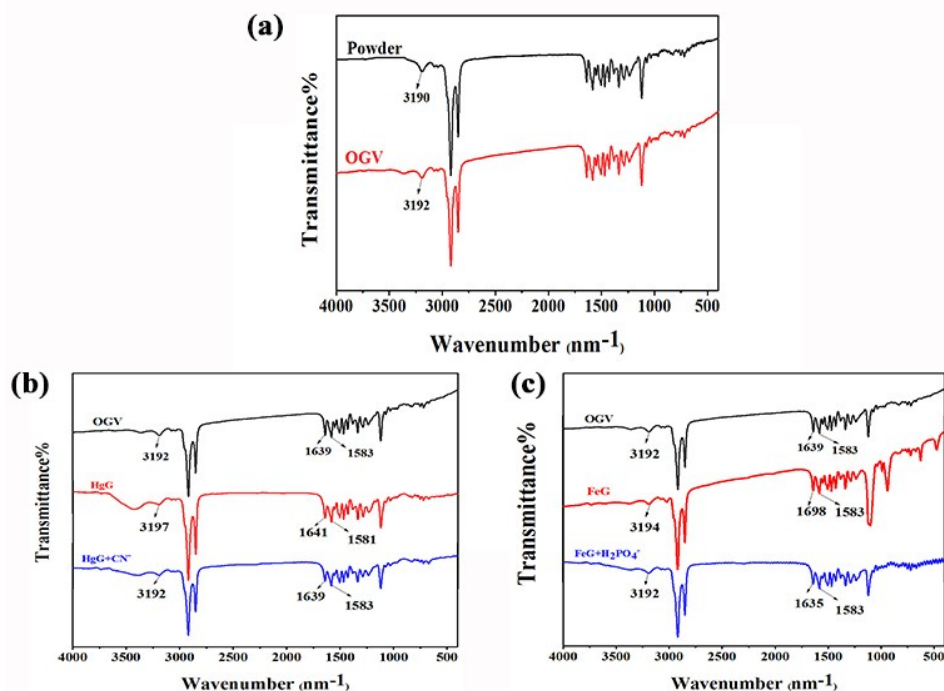

**Fig. S10** FT-IR spectra of (a) powder G and xerogel of organogel OGV, (b) xerogel of OGV, HgG and xerogel of HgG treated with  $\text{CN}^-$ , (c) xerogel of OGV, FeG and xerogel of FeG treated with  $\text{H}_2\text{PO}_4^-$ .

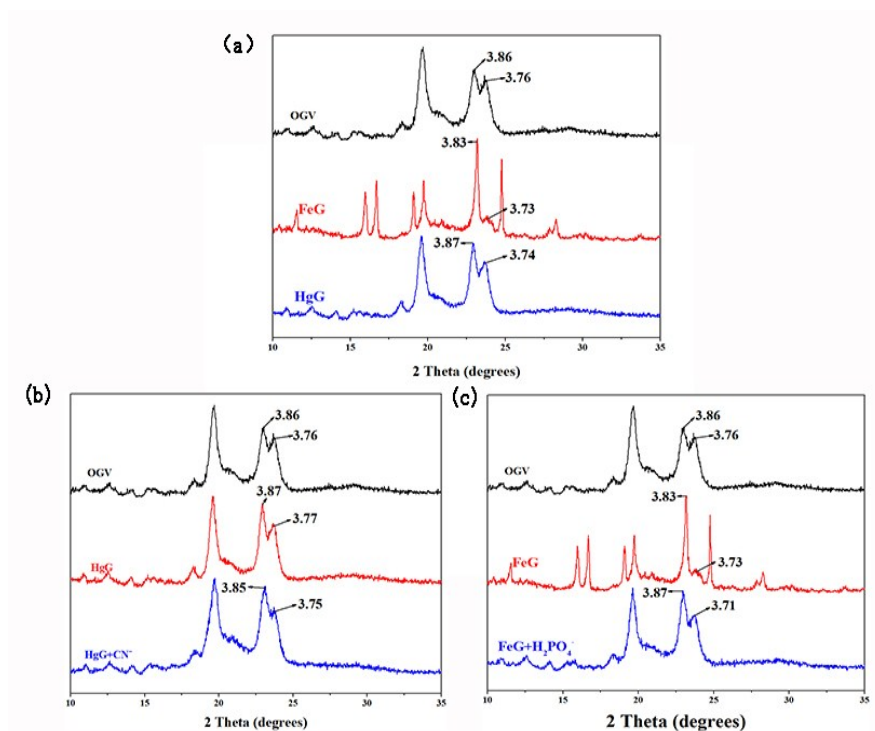

**Fig. S11** Powder XRD pattern of (a) organogel OGV and metallogel (HgG and FeG), (b) organogel OGV, HgG and HgG treated with  $\text{CN}^-$ , (c) organogel OGV, FeG and FeG treated with  $\text{H}_2\text{PO}_4^-$ .

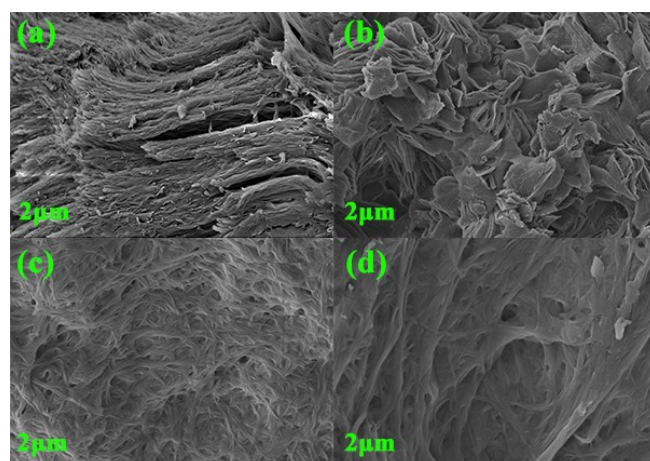

**Fig. S12** SEM image of (a) HgG xerogel; (b) FeG xerogel ; (c) HgG xerogel treated with  $\text{CN}^-$ ; (d) FeG xerogel treated with  $\text{H}_2\text{PO}_4^-$ .
